# Supplementary material for: Multiple Sclerosis Onset before and after COVID-19 Vaccination: Can HLA Haplotype Be Determinant?
Source: MDPI journal article supplement (doi:10.3390/ijms25084556), 2024-04-22
Supplement: s1 [file s1]

**Supplementary Table S1:** Univariate analysis post PSM regarding the effect of post-vaccine onset\* of MS with the EDSS at presentation, at relapse and recovery after relapse. \*Considering a maximum of 1 month between vaccination and MS onset

|                                   | Post-vaccine diagnosis | All patients diagnosed b/w 2018 and 2022 | p-value* |
|-----------------------------------|------------------------|------------------------------------------|----------|
| Number of patients                | 11                     | 11                                       |          |
| Onset EDSS - median (IQR)         | 2.0 (1.13 – 2.38)      | 2.0 (1.13 – 2.38)                        | 0.514    |
| EDSS After Relapse - median (IQR) | 1.0 (0.25 – 1.50)      | 1.0 (0.25 – 1.50)                        | 0.812    |
| Recovery                          |                        |                                          | 0.735    |
| None (%)                          | 1 (9.1%)               | 1 (9.1%)                                 |          |
| Partial (%)                       | 7 (63.6%)              | 6 (54.5%)                                |          |
| Full (%)                          | 3 (27.2%)              | 4 (36.4%)                                |          |

**Supplementary Table S2:** Comparison between patients with post-vaccine and non-vaccine related new diagnosis of MS considering a maximum of 2 months between Sars-CoV-2 vaccination and demyelinating event onset.

|                                                     | Post-vaccine new diagnosis of MS | Non-vaccine related new diagnosis of MS | p-value* |
|-----------------------------------------------------|----------------------------------|-----------------------------------------|----------|
| Number of patients with new diagnosis of MS         | 18                               | 248                                     |          |
| Women (%)                                           | 14/18 (77.8%)                    | 174/248 (70.2%)                         | 0.574    |
| Age in years - median (IQR)                         | 33.0 (26.00 – 40.00)             | 33.0 (26.00 – 40.00)                    | 0.156    |
| Family History of MS (%)                            | 1/18 (5.6%)                      | 17/248 (6.9%)                           | 1.000    |
| Autoimmune comorbidity (%)                          | 0/18 (0.0%)                      | 25/248 (10.1%)                          | 0.331    |
| Time from Onset to Diagnosis - median (IQR)         | 4.0 (2.00 – 7.00)                | 4.0 (2.00 – 8.00)                       | 0.907    |
| Type of onset                                       |                                  |                                         | 0.882    |
| Optic neuritis (%)                                  | 2/18 (11.1%)                     | 48/248 (19.4%)                          |          |
| Brain stem (%)                                      | 5/18 (27.8%)                     | 48/248 (19.4%)                          |          |
| Cerebellum (%)                                      | 0/18 (0.0%)                      | 4/248 (1.6%)                            |          |
| Spinal Cord (%)                                     | 6/18 (33.3%)                     | 66/248 (26.6%)                          |          |
| Supratentorial (%)                                  | 1/18 (5.6%)                      | 29/248 (11.7%)                          |          |
| Multisystemic (%)                                   | 4/18 (22.2%)                     | 53/248 (21.4%)                          |          |
| Oligoclonal bands (%)                               | 13/16 (81.3%)                    | 209/233 (89.6%)                         | 0.538    |
| EDSS at onset - median (IQR)                        | 2.0 (1.50 – 2.50)                | 2.0 (1.50 – 2.50)                       | 0.511    |
| EDSS After Relapse - median (IQR)                   | 1.0 (1.00 – 1.25)                | 1.0 (0.00 – 1.50)                       | 0.418    |
| Clinical recovery after pulsed steroid therapy      |                                  |                                         | 0.201    |
| None (%)                                            | 2/18 (11.1%)                     | 15/248 (6.0%)                           |          |
| Partial (%)                                         | 12/18 (66.7%)                    | 151/248 (60.9%)                         |          |
| Full (%)                                            | 4/18 (22.2%)                     | 82/248 (33.1%)                          |          |
| MRI Brain stem (%)                                  | 8/18 (44.4%)                     | 101/248 (40.7%)                         | 0.914    |
| MRI Cerebellum (%)                                  | 5/18 (27.8%)                     | 71/248 (28.6%)                          | 1.000    |
| MRI Spinal cord (%)                                 | 13/18 (72.2%)                    | 179/248 (72.2%)                         | 0.954    |
| MRI Infratentorial (%)                              | 11/18 (61.1%)                    | 130/248 (52.4%)                         | 0.595    |
| MRI number of supratentorial lesions - median (IQR) | 5.0 (3.00 – 9.00)                | 5.0 (3.00 – 9.00)                       | 0.396    |
| MRI Contrast Enhancement (%)                        | 13/18 (72.2%)                    | 131/248 (52.8%)                         | 0.168    |
| Highly active efficacy therapy (%)                  | 10/13 (76.9%)                    | 112/243 (46.1%)                         | 0.055    |
| Smoke (%)                                           | 4/18 (22.2%)                     | 83/248 (33.5%)                          | 0.444    |

|                            |                      |                           |       |
|----------------------------|----------------------|---------------------------|-------|
| Vitamin D - median (IQR)   | 23.9 (17.55 – 30.76) | 23.9 23.9 (17.55 – 30.76) | 0.123 |
| BMI (kg/m2) - median (IQR) | 23.6 (21.30 – 26.23) | 23.6 (21.30 – 26.23)      | 0.995 |
| EBV positive serology (%)  | 17/18 (94.4%)        | 201/248 (81.0%)           | 0.283 |

**Supplementary Table S3:** Descriptive HLA-DRB1 Haplotypes of 17 patients with disease onset in the pre-COVID era (control group 1), 18 patients with disease onset in the post-COVID but not-vaccine-related (control group 2), and all 14 patients with a post-vaccine new diagnosis of MS (cases).

| HLA-DRB1 Haplotypes |                 |                 |
|---------------------|-----------------|-----------------|
| before-COVID19 era  | COVID19-era     |                 |
|                     | Post-vaccine    | Not vaccinated  |
| DRB1*13/DRB1*13     | DRB1*13/DRB1*13 | DRB1*03/DRB1*16 |
| DRB1*03/DRB1*07     | DRB1*01/DRB1*01 | DRB1*10/DRB1*11 |
| DRB1*01/DRB1*07     | DRB1*03/DRB1*14 | DRB1*13/DRB1*13 |
| DRB1*11/DRB1*14     | DRB1*04/DRB1*13 | DRB1*01/DRB1*04 |
| DRB1*01/DRB1*16     | DRB1*01/DRB1*04 | DRB1*08/DRB1*11 |
| DRB1*03/DRB1*04     | DRB1*03/DRB1*07 | DRB1*03/DRB1*04 |
| DRB1*15/DRB1*16     | DRB1*03/DRB1*07 | DRB1*01/DRB1*16 |
| DRB1*07/DRB1*13     | DRB1*08/DRB1*13 | DRB1*03/DRB1*11 |
| DRB1*15/DRB1*14     | DRB1*15/DRB1*15 | DRB1*11/DRB1*16 |
| DRB1*03/DRB1*07     | DRB1*03/DRB1*11 | DRB1*08/DRB1*13 |
| DRB1*03/DRB1*11     | DRB1*15/DRB1*15 | DRB1*08/DRB1*13 |
| DRB1*13/DRB1*04     | DRB1*07/DRB1*15 | DRB1*10/DRB1*13 |
| DRB1*04/DRB1*11     | DRB1*03/DRB1*11 | DRB1*11/DRB1*12 |
| DRB1*11/DRB1*15     | DRB1*03/DRB1*07 | DRB1*07/DRB1*07 |
| DRB1*03/DRB1*16     | DRB1*01/DRB1*01 |                 |
| DRB1*11/DRB1*11     | DRB1*15/DRB1*15 |                 |
| DRB1*07/DRB1*13     | DRB1*01/DRB1*01 |                 |
|                     | DRB1*11/DRB1*14 |                 |
